# Supplementary material
Source: PubMed Central journal article supplement (PMC6693656)
Supplement: NIHMS1534854-supplement-Supplemental_Publication_Material.pdf [file NIHMS1534854-supplement-Supplemental_Publication_Material.pdf]

## **SUPPLEMENTAL MATERIAL**

## **Supplemental Methods**

### **Flow cytometry for detection of endothelial subpopulation markers**

Aortas were harvested from four mice and enzymatically digested with collagenase and elastase as described above. Single cell suspensions were stained with Brilliant Violet 421 anti-mouse Cd31 (Biolegend), APC anti-mouse Cd36 (Biolegend), and FITC anti-mouse Vcam1 (Biolegend), and separately with isotype controls for each antibody. The Cd31 positive population was gated for analysis of Cd36 and Vcam1 expression in aortic ECs on a Cytoflex LX flow cytometer (Beckman Coulter).

### **Immunofluorescence of en face aorta**

Mice were euthanized and perfused with 15 ml of 4% ice cold paraformaldehyde. Aortas were harvested from the root to the descending aorta and dissected longitudinally for en face immunofluorescence. Blocking and permeabilization were performed in 1x Dulbecco's Phosphate-Buffered Saline (DPBS) with 1% bovine serum albumin (BSA), 5% donkey serum, 0.1% Tween 20 and 0.1 % Triton X-100 (block buffer) for four hours at 4°C. Primary antibodies were diluted in block buffer and incubated overnight at 4°C targeting VE-Cadherin (Cell Signaling Technology), Vcam1 (Cell Signaling Technology) and Cd36 (Abcam). Secondary antibodies labelled with Alexa488, Alexa594 and Alexa647 (Thermo Fisher Scientific) were diluted in the block buffer and incubated for 45 minutes at room temperature. The DAPI stained (1:10000 in PBS) aorta was mounted with the endothelial surface en face.

### **Fluorescent imaging and image quantification**

Confocal image acquisition for fluorescence quantification was performed using an automated Opera Phenix High-Content Screening System (PerkinElmer) with 20x magnification and 1  $\mu\text{M}$  thickness per stack. All the images were acquired on the same day and with same fluorescence parameters. Fluorescence quantification was performed using Harmony High-Content Imaging and Analysis Software (PerkinElmer). 20x images tiled across the specimen were used to reconstruct the whole slide. Nuclei were identified via DAPI staining and vascular smooth muscle cell nuclei were excluded using roundness ( $\geq 0.7$ ) and area ( $\geq 50 \mu\text{m}^2$ ) parameters on the image stacks demonstrating VE-Cadherin-targeted antibody fluorescence. Mean intensity of Vcam1 and Cd36-targeted antibody fluorescence were measured in a radius of 10 pixels around the nuclei on the plane of interest.

Autofluorescence from fat cells was removed by excluding fluorescence signals with an intensity z-score $>5$ . To generate spatial maps of fluorescence signal, mean fluorescence for each cell was plotted on X and Y coordinates using the R software package. Vcam1 and Cd36 expression were quantified in each cell from two representative 20x high power field images taken from the aortic greater and lesser curvatures. For each aortic region, the ratio of Vcam1-associated fluorescence to Cd36-associated fluorescence was obtained from three separate aortic root samples, log-transformed, and compared using the Wilcoxon rank-sum test.

## **Computational Analysis**

### **Pre-processing of droplet-based scRNA-seq data.**

De-multiplexing, alignment to the mm10 transcriptome and unique molecular identifier (UMI)-collapsing were performed using the Cellranger toolkit (version 2.1.0)

provided by 10X Genomics. The output was a corrected expression matrix, which was used as an input for further analysis.

### **Transcription factor target scores**

Targets for transcription factors of interest were identified using Version 2 of the TRRUST database<sup>1</sup>. To capture the net effect on expression of targets for a given transcription factor, gene set scores were computed for all cells for gene sets comprising known targets of TF activation. Gene set scores were computed using the Seurat AddModuleScore function as previously described<sup>2</sup>. Briefly, a background gene set was created for each signature gene set by selecting the 10n nearest neighbors to the signature set genes as determined by mean expression and detection frequency in all cells. For each cell, the gene set score was defined as the mean expression of the genes in the signature set minus the mean expression of the background set genes. Significant differences in gene set score distributions between subpopulations were determined using the Mann-Whitney U-test in R.

### **Integrated analysis of normal and high-fat diet scRNA-seq data**

Aortic single cell RNA-seq datasets from normal and high-fat diet fed mice were combined using established methods for combined analysis of two single cell data sets in Seurat<sup>3</sup>. Briefly, this approach uses canonical correlation analysis (CCA) to identify similarities between the datasets and PCA to identify differences. The Seurat RunCCA function generates shared canonical 'basis' vectors which captured shared correlation. These basis vectors were aligned using Seurat functions to generate a unified aligned low-dimensional space representing both data sets. Subpopulations shared between the two datasets were identified using the Seurat FindClusters function as previously

described using the top 15 canonical correlates from CCA and a resolution of 0.5. Markers of each subpopulation were identified as previously described using Seurat. In order to identify condition-specific genes that varied between datasets, the FindMarkers function was applied to unaligned data in a low-dimensional space defined by PCA as previously described.

1. Han H, Cho J-W, Lee S, Yun A, Kim H, Bae D, Yang S, Kim CY, Lee M, Kim E, Lee S, Kang B, Jeong D, Kim Y, Jeon H-N, Jung H, Nam S, Chung M, Kim J-H, Lee I. TRRUST v2: an expanded reference database of human and mouse transcriptional regulatory interactions. *Nucleic Acids Res.* 2018;46:D380–D386.
2. Tirosh I, Izar B, Prakadan SM, Wadsworth MH, Treacy D, Trombetta JJ, Rotem A, Rodman C, Lian C, Murphy G, Fallahi-Sichani M, Dutton-Regester K, Lin J-R, Cohen O, Shah P, Lu D, Genshaft AS, Hughes TK, Ziegler CGK, Kazer SW, Gaillard A, Kolb KE, Villani A-C, Johannessen CM, Andreev AY, Van Allen EM, Bertagnolli M, Sorger PK, Sullivan RJ, Flaherty KT, Frederick DT, Jané-Valbuena J, Yoon CH, Rozenblatt-Rosen O, Shalek AK, Regev A, Garraway LA. Dissecting the multicellular ecosystem of metastatic melanoma by single-cell RNA-seq. *Science.* 2016;352:189–196.
3. Butler A, Hoffman P, Smibert P, Papalexi E, Satija R. Integrating single-cell transcriptomic data across different conditions, technologies, and species. *Nat Biotech.* 2018;36:411–420.

## Supplemental Table 1: Aortic cell type markers

| Cell Type     | Marker Gene(s)        |
|---------------|-----------------------|
| Fibroblasts   | Pdgfra                |
| VSMC          | Cnn1, Myh11           |
| EC            | Cdh5                  |
| Monocytes     | Cd68, Cd115, Lyz2     |
| T/B cells     | Cd3d, Cd19            |
| Macrophage/DC | H2-Ab1 (MHC-II), Cd68 |
| RBC           | Hbb                   |

Markers used to identify aortic cell types.

**Supplemental Table 2: Markers differentiating aortic monocytes and macrophages**

|         | p_val     | avg_logFC | % monocytes | % Macrophages | p_val_adj |
|---------|-----------|-----------|-------------|---------------|-----------|
| Cd52    | 3.40E-152 | -1.98     | 0.338       | 0.987         | 5.92E-148 |
| Sepp1   | 1.13E-149 | 2.77      | 0.998       | 0.462         | 1.97E-145 |
| Pf4     | 6.65E-147 | 3.16      | 0.987       | 0.144         | 1.16E-142 |
| Napsa   | 2.17E-145 | -1.64     | 0.008       | 0.628         | 3.77E-141 |
| ApoE    | 5.74E-143 | 2.90      | 0.997       | 0.429         | 9.99E-139 |
| Ear2    | 2.01E-141 | -2.50     | 0.004       | 0.599         | 3.50E-137 |
| Lsp1    | 5.07E-138 | -1.76     | 0.234       | 0.936         | 8.82E-134 |
| Clqa    | 7.15E-138 | 2.19      | 1           | 0.244         | 1.25E-133 |
| Tmsb10  | 9.92E-136 | -2.04     | 0.248       | 0.92          | 1.73E-131 |
| Clqc    | 1.08E-132 | 2.11      | 0.998       | 0.205         | 1.88E-128 |
| Lgals3  | 7.96E-130 | -1.75     | 0.24        | 0.929         | 1.39E-125 |
| Itm2b   | 2.32E-127 | 1.32      | 0.998       | 0.933         | 4.05E-123 |
| Ccr2    | 1.59E-126 | -1.45     | 0.039       | 0.657         | 2.76E-122 |
| Clqb    | 3.43E-121 | 1.83      | 1           | 0.292         | 5.98E-117 |
| H2-DMb2 | 9.19E-120 | -1.38     | 0.007       | 0.532         | 1.60E-115 |
| Maf     | 1.25E-113 | 2.04      | 0.882       | 0.106         | 2.18E-109 |
| Ninj1   | 4.84E-113 | 2.32      | 0.879       | 0.183         | 8.43E-109 |
| Ctsb    | 3.57E-112 | 1.43      | 0.985       | 0.676         | 6.22E-108 |
| Mrc1    | 7.72E-110 | 1.81      | 0.92        | 0.353         | 1.34E-105 |
| Ltb4r1  | 2.28E-109 | -1.20     | 0.003       | 0.478         | 3.97E-105 |
| Cbr2    | 3.22E-109 | 2.20      | 0.847       | 0.08          | 5.60E-105 |
| F13a1   | 3.45E-107 | 1.88      | 0.914       | 0.292         | 6.01E-103 |
| Folr2   | 2.45E-106 | 2.67      | 0.806       | 0.019         | 4.27E-102 |
| Lyve1   | 3.48E-106 | 2.59      | 0.806       | 0.019         | 6.06E-102 |
| Csf1r   | 1.39E-105 | 1.53      | 0.935       | 0.372         | 2.42E-101 |
| Actg1   | 2.86E-103 | -1.08     | 0.898       | 0.997         | 4.97E-99  |
| Gm2a    | 4.94E-99  | -1.51     | 0.281       | 0.859         | 8.60E-95  |
| Ms4a6b  | 3.22E-97  | 1.76      | 0.85        | 0.183         | 5.61E-93  |
| H2-DMb1 | 7.45E-95  | -1.35     | 0.316       | 0.881         | 1.30E-90  |
| Fil1    | 3.85E-94  | 0.72      | 1           | 1             | 6.70E-90  |
| Coro1a  | 5.83E-94  | -1.19     | 0.476       | 0.952         | 1.02E-89  |
| H2-DMa  | 2.06E-92  | -1.38     | 0.498       | 0.913         | 3.58E-88  |
| Tmsb4x  | 4.58E-92  | -0.55     | 1           | 0.997         | 7.98E-88  |
| Glul    | 2.64E-91  | 1.53      | 0.869       | 0.365         | 4.61E-87  |
| Bcl2a1d | 3.70E-91  | -0.96     | 0.01        | 0.433         | 6.45E-87  |
| Plbd1   | 5.11E-91  | -1.33     | 0.072       | 0.596         | 8.89E-87  |
| Cd63    | 1.56E-88  | 1.44      | 0.893       | 0.285         | 2.71E-84  |
| Lgmn    | 1.01E-87  | 1.40      | 0.891       | 0.298         | 1.77E-83  |
| Cd24a   | 2.91E-85  | -1.16     | 0.011       | 0.41          | 5.07E-81  |
| Gas6    | 1.13E-84  | 1.78      | 0.74        | 0.083         | 1.97E-80  |
| Rplp0   | 1.36E-84  | -0.82     | 0.949       | 0.981         | 2.37E-80  |
| Id2     | 1.90E-84  | -1.35     | 0.088       | 0.603         | 3.30E-80  |
| Ifitm2  | 4.56E-82  | 1.15      | 0.947       | 0.676         | 7.94E-78  |
| Trf     | 7.13E-82  | 1.26      | 0.924       | 0.494         | 1.24E-77  |

Markers differentiating aortic monocytes and macrophages. Columns correspond to gene name (Gene), unadjusted p-value of Wilcoxon rank sum test (p\_val), average log fold change in monocytes vs. macrophages (avg\_logFC), percent of monocytes expressing gene (% Monocytes), percent of macrophages expressing gene (% Macrophages), and Bonferroni-corrected p-value (p\_val\_adj).

**Supplemental Table 3: GO set-based gene lists**

| <b>Development</b> | <b>Differentiation</b> |
|--------------------|------------------------|
| Add1               | Acvr1                  |
| Arhgef26           | Acvr2b                 |
| Ccm2               | Acvr11                 |
| Cdh5               | Add1                   |
| Cldn1              | Alox12                 |
| Cldn5              | Apold1                 |
| Clic4              | Arhgef26               |
| Col18a1            | Atoh8                  |
| Ctnnb1             | Bmp4                   |
| Dmd                | Bmp6                   |
| Eng                | Bmper                  |
| Ezr                | Bmpr2                  |
| F11r               | Btg1                   |
| F2r1               | Ccm2                   |
| Gpx1               | Cdh5                   |
| Gstm3              | Ceacam1                |
| Heg1               | Cldn1                  |
| Icam1              | Cldn5                  |
| Id1                | Clic4                  |
| Ikbkb              | Col18a1                |
| Il1b               | Ctnnb1                 |
| Marveld2           | Dll1                   |
| Met                | Dmd                    |
| Msn                | Edf1                   |
| Myadm              | Eng                    |
| Myd88              | Ezr                    |
| Notch4             | F11r                   |
| Pde2a              | F2r1                   |
| Pde4d              | Gdf2                   |
| Pecam1             | Gpx1                   |
| Plod3              | Gstm3                  |
| Ppp1r16b           | Heg1                   |
| Ptpns              | Hey1                   |
| Rap1a              | Hey2                   |
| Rap1b              | Hoxb5                  |
| Rap2c              | Icam1                  |
| Rapgef1            | Id1                    |
| Rapgef2            | Ikbkb                  |
| Rapgef3            | Il1b                   |
| Rdx                | Jag1                   |
| Rock1              | Kdm6b                  |
| Rock2              | Lama5                  |
| S1pr2              | Marveld2               |
| S1pr3              | Met                    |
| Sox18              | Msn                    |
| Stc1               | Myadm                  |
| Tjp1               | Myd88                  |
| Tjp2               | Notch1                 |
| Tnf                | Notch4                 |
| Tnfrsf1a           | Nr2f2                  |
| Tnmd               | Nrg1                   |
| VeZF1              | Nrp1                   |
|                    | Pde2a                  |
|                    | Pde4d                  |
|                    | Pdpn                   |
|                    | Pecam1                 |
|                    | Plod3                  |
|                    | Ppp1r16b               |
|                    | Prox1                  |
|                    | Prox2                  |
|                    | Ptn                    |
|                    | Ptpns                  |
|                    | Rap1a                  |
|                    | Rap1b                  |
|                    | Rap2c                  |
|                    | Rapgef1                |
|                    | Rapgef2                |
|                    | Rapgef3                |
|                    | Rbpj                   |
|                    | Rdx                    |
|                    | Rock1                  |
|                    | Rock2                  |
|                    | S1pr1                  |
|                    | S1pr2                  |
|                    | S1pr3                  |
|                    | Scube1                 |
|                    | Smad4                  |
|                    | Sox17                  |
|                    | Sox18                  |
|                    | Stc1                   |
|                    | Tjp1                   |
|                    | Tjp2                   |
|                    | Tmem100                |
|                    | Tnf                    |
|                    | Tnfrsf1a               |
|                    | Tnmd                   |
|                    | VeZF1                  |
|                    | Xdh                    |
|                    | Zeb1                   |

List of genes used to define GO geneset-based scores in ECs.



**Supplemental Table 4: EC subpopulation pathway signature gene lists**

| <b>ECM Organization</b> | <b>Integrin Signaling</b> | <b>Lipoprotein Handling</b> |
|-------------------------|---------------------------|-----------------------------|
| Bgn                     | Vcam1                     | Gpihbp1                     |
| Vcam1                   | Fn1                       | Lpl                         |
| Mfap5                   | Thbs1                     | Scarb1                      |
| Bmp4                    | Col4a3                    | Mylip                       |
| Fn1                     | Icam1                     | Angptl4                     |
| Lox                     |                           | Apoc1                       |
| Pcolce2                 |                           | Pltp                        |
| Fbln5                   |                           |                             |
| Efemp1                  |                           |                             |
| Thbs1                   |                           |                             |
| Col4a3                  |                           |                             |
| Col5a2                  |                           |                             |
| Icam1                   |                           |                             |
| Col8a1                  |                           |                             |
| Dcn                     |                           |                             |

List of genes used to define EC subpopulation pathway signature scores

### Supplemental Table 5: Tip identity gene list

| Tip Genes |
|-----------|
| Nrp2      |
| Cxcr4     |
| Cd34      |
| Dll4      |
| Apln      |
| Kdr       |
| Plxnd1    |
| Unc5b     |
| Efnb2     |
| Angpt2    |
| Nrp1      |
| Robo4     |
| Flt4      |
| Pdgfb     |

List of genes used to define tip identity score in ECs.

Collagenase-based Dissociation

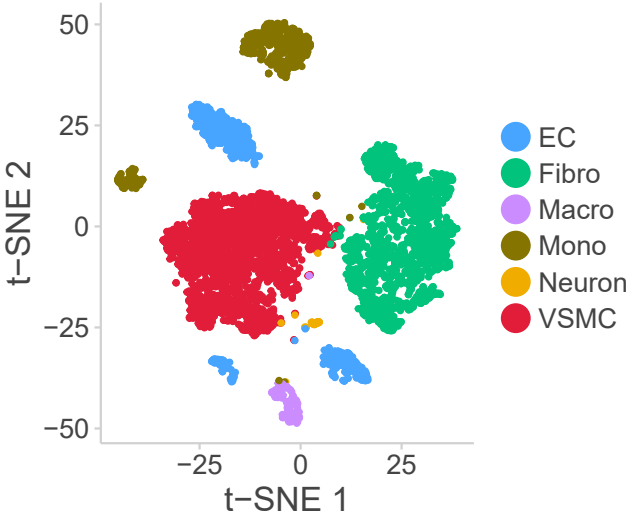

Elastase-based Dissociation

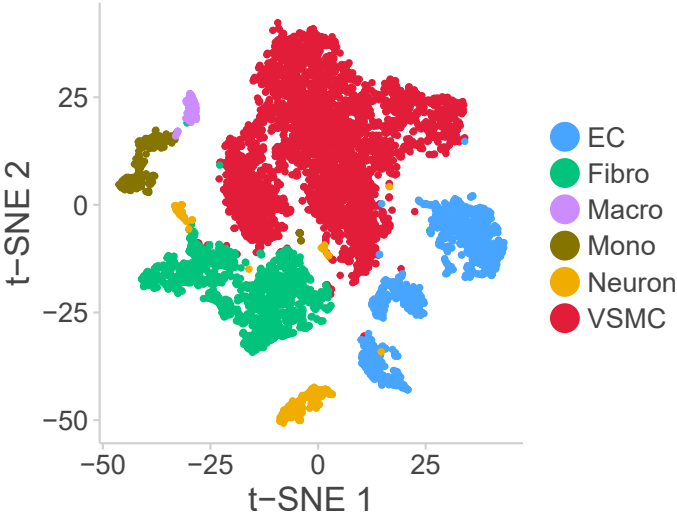

Supplemental Figure 2

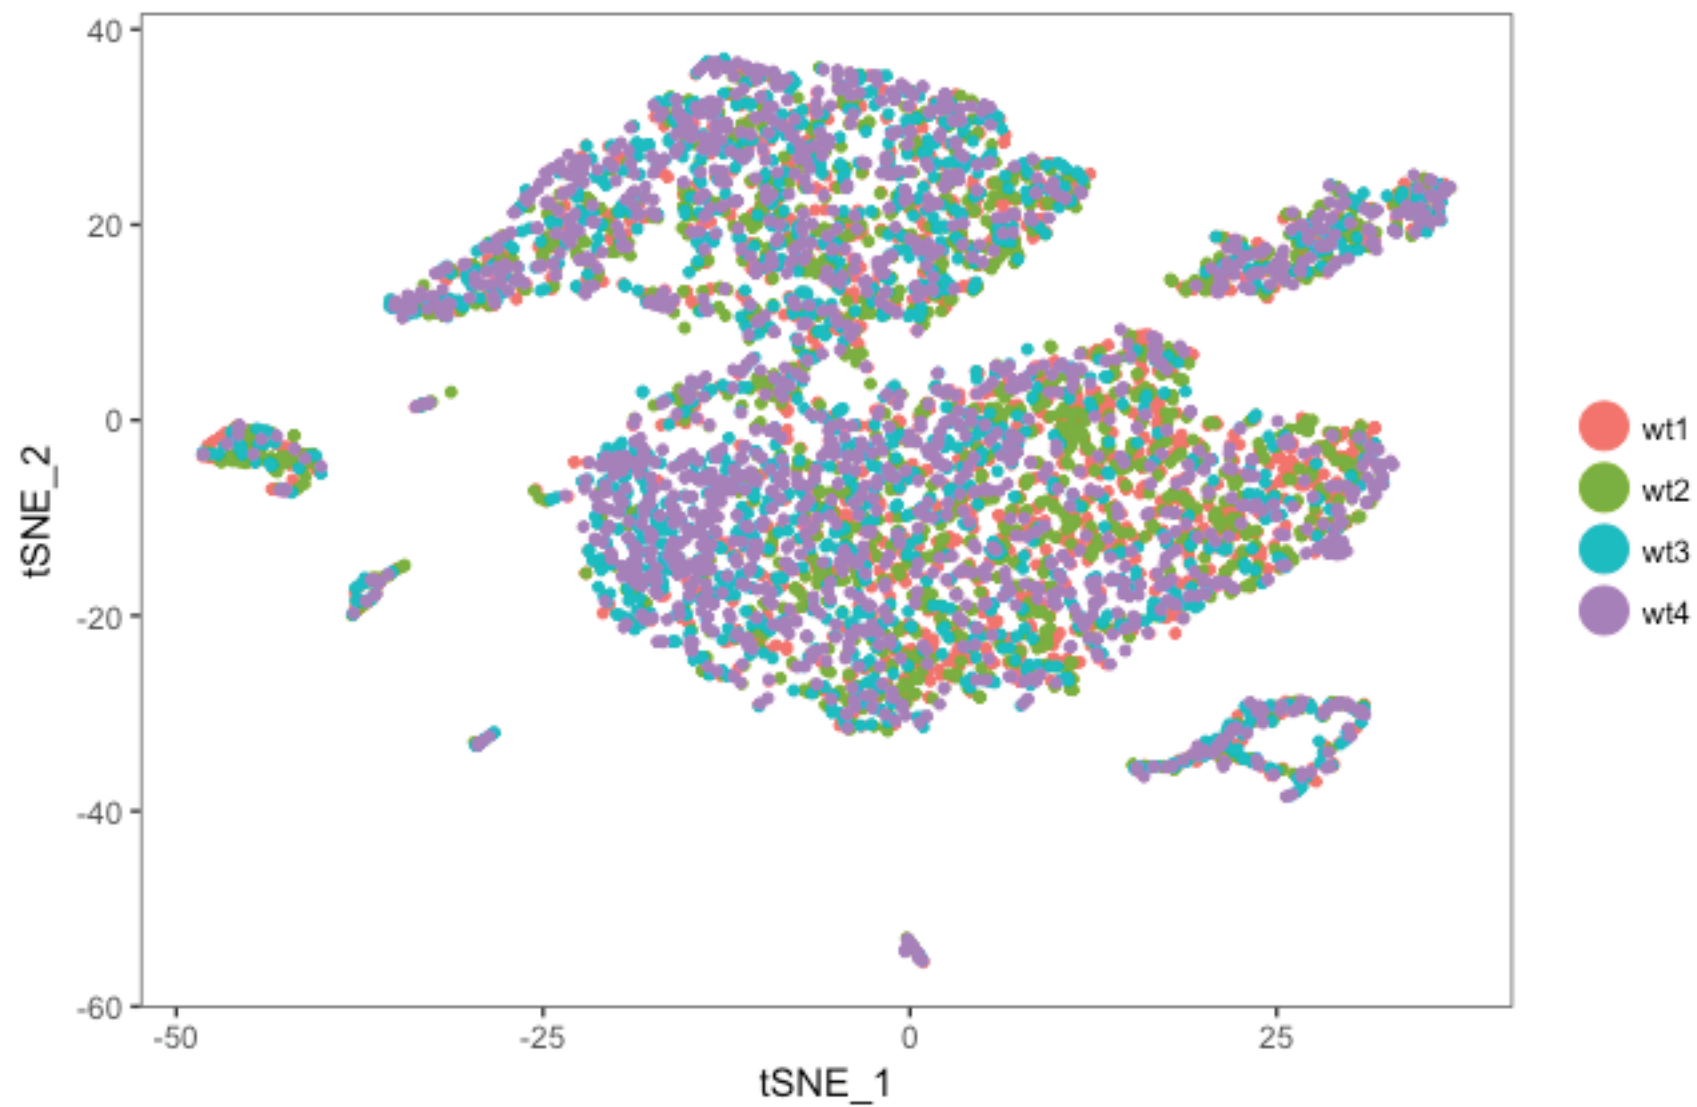

Supplemental Figure 3

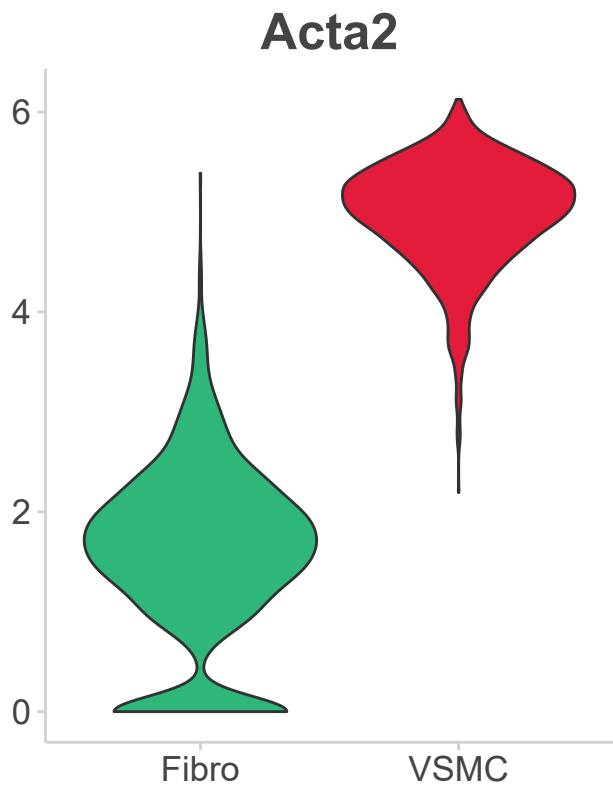

Supplemental Figure 4

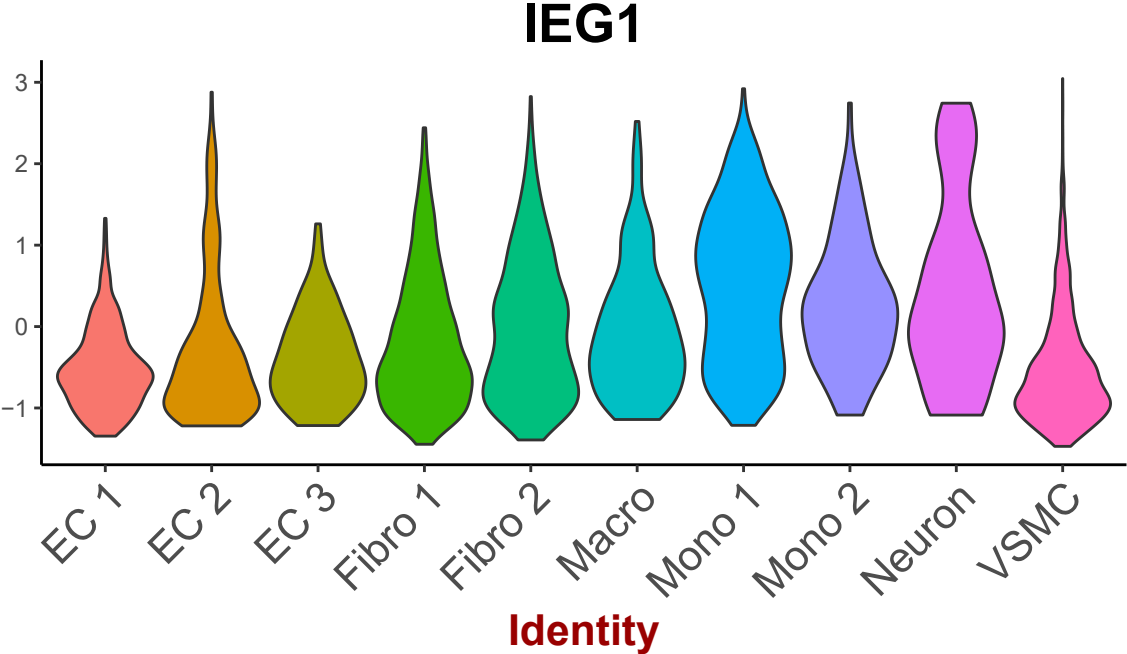

Supplemental Figure 5

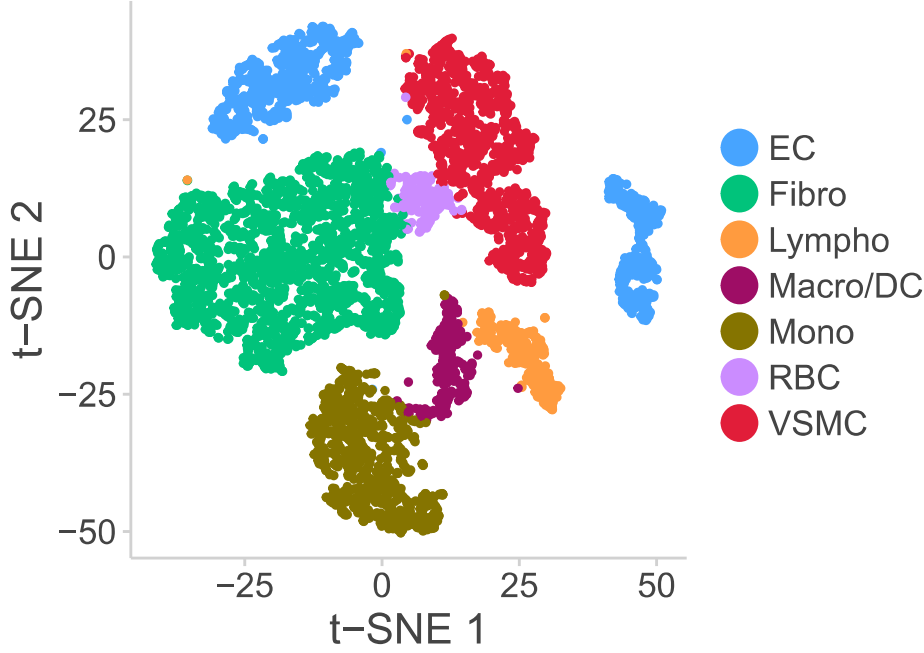

Supplemental Figure 6

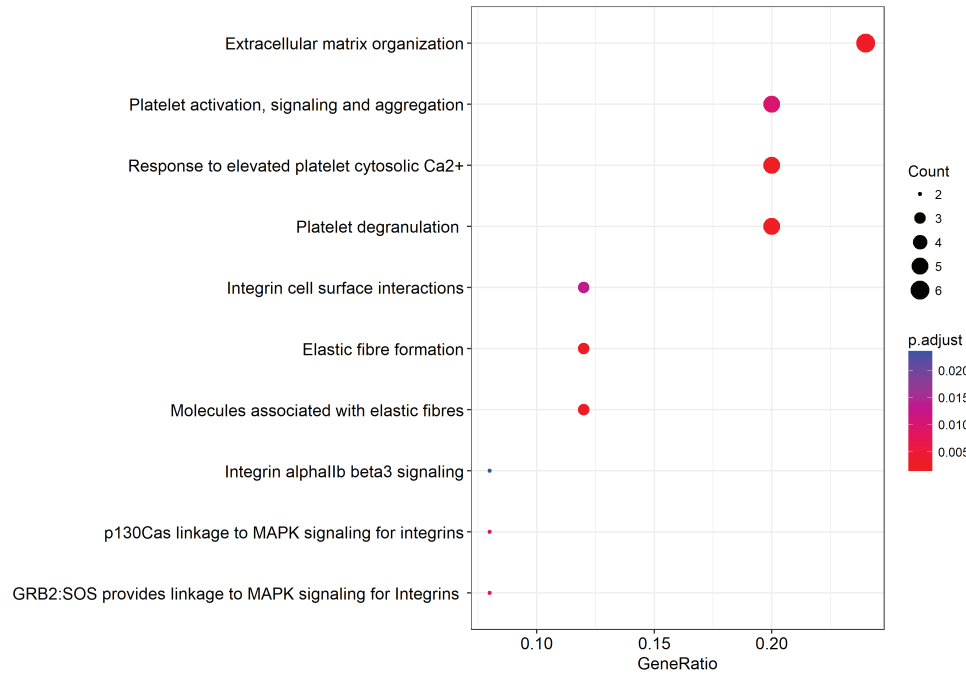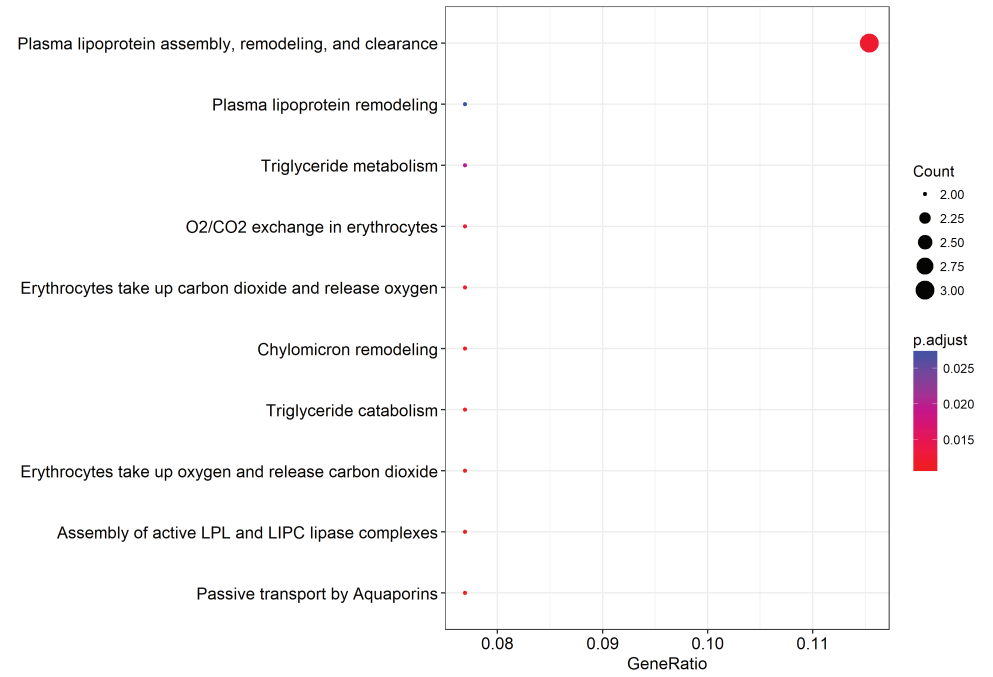



Supplemental Figure 7

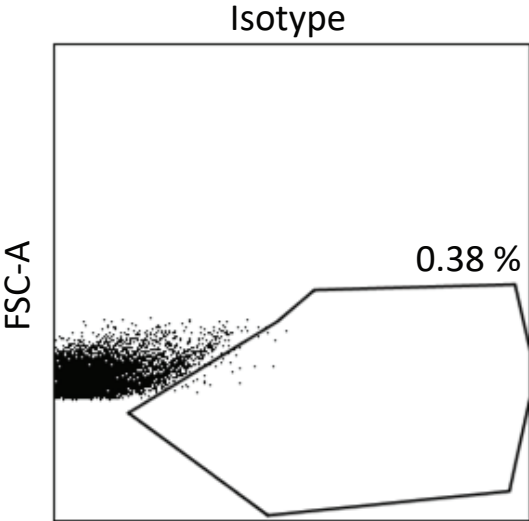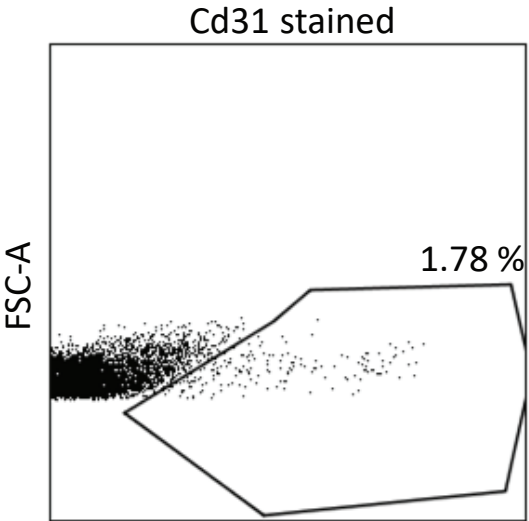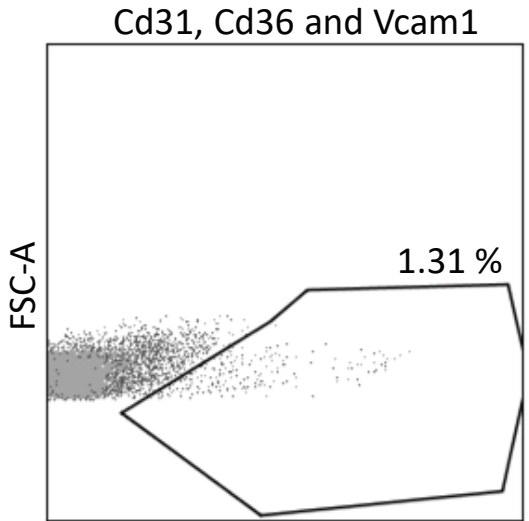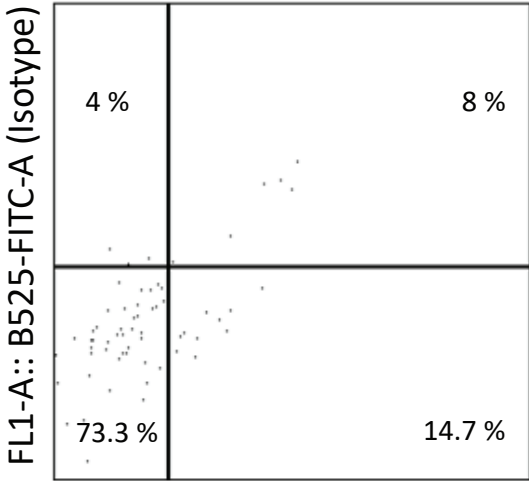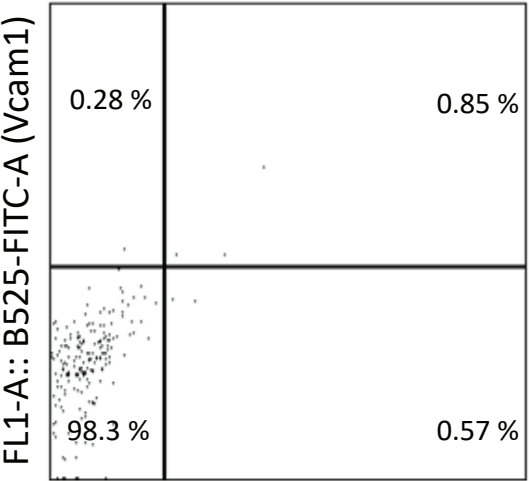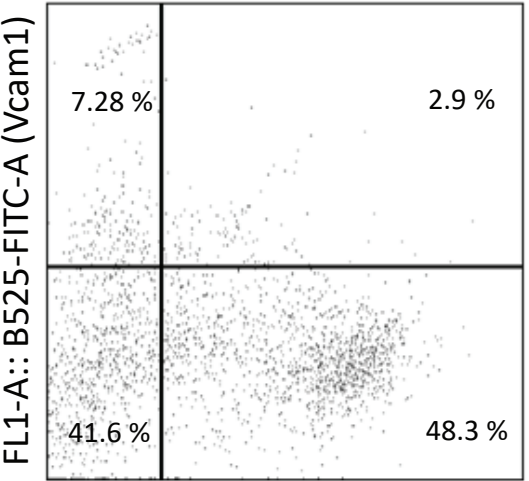

Supplemental Figure 8

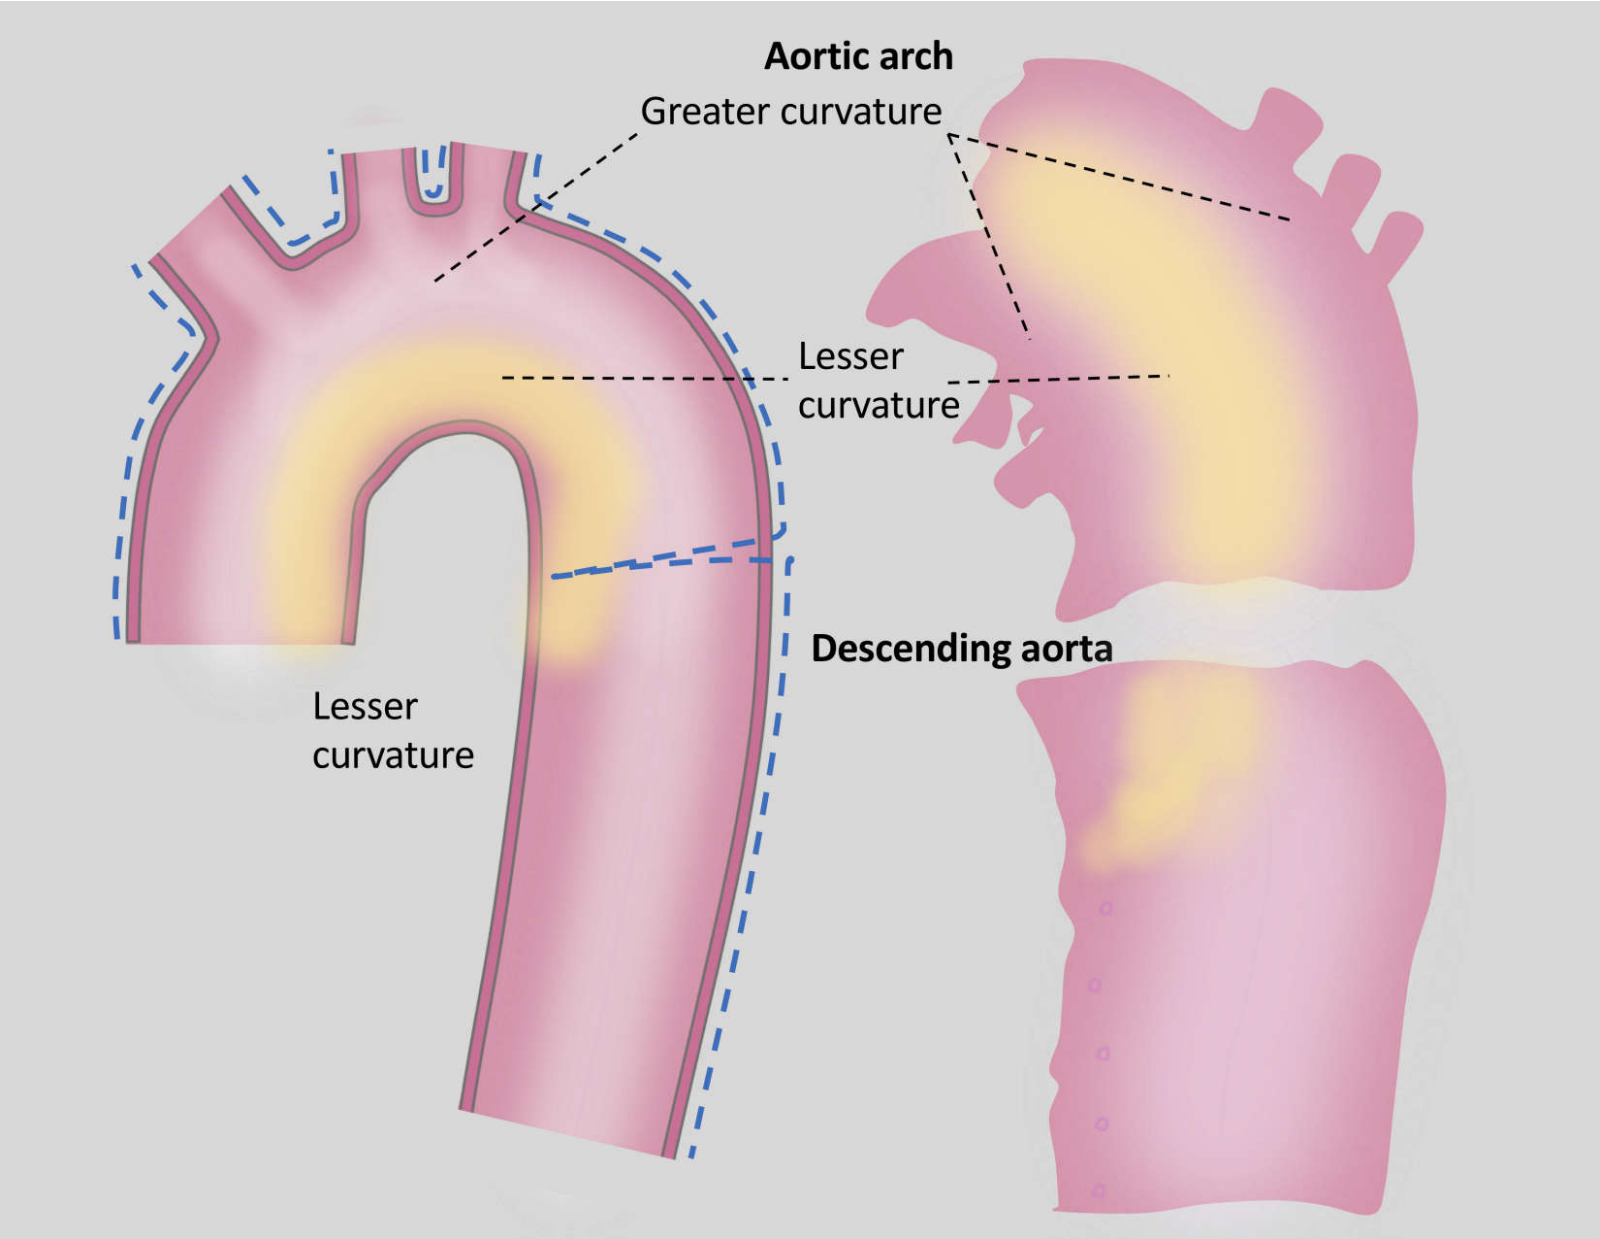

Supplemental Figure 9

a

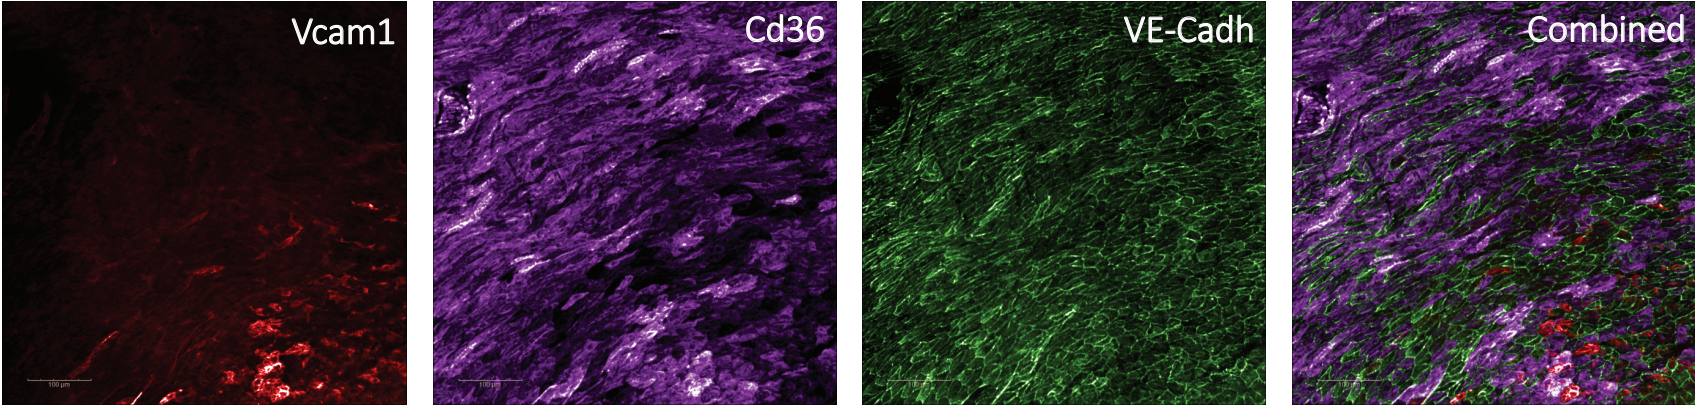

b

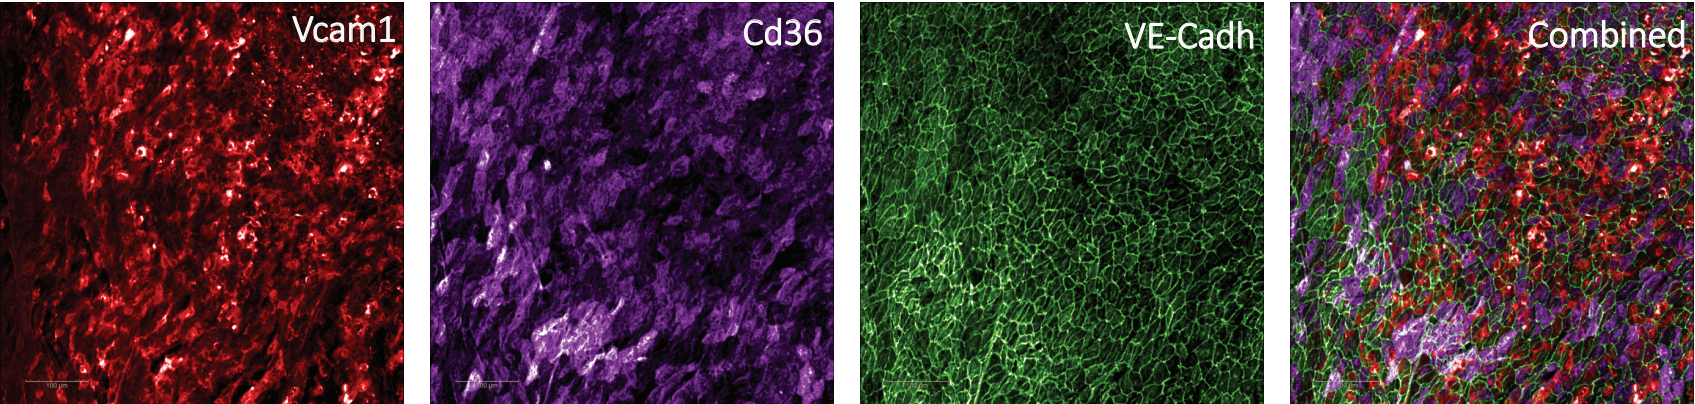

Supplemental Figure 10

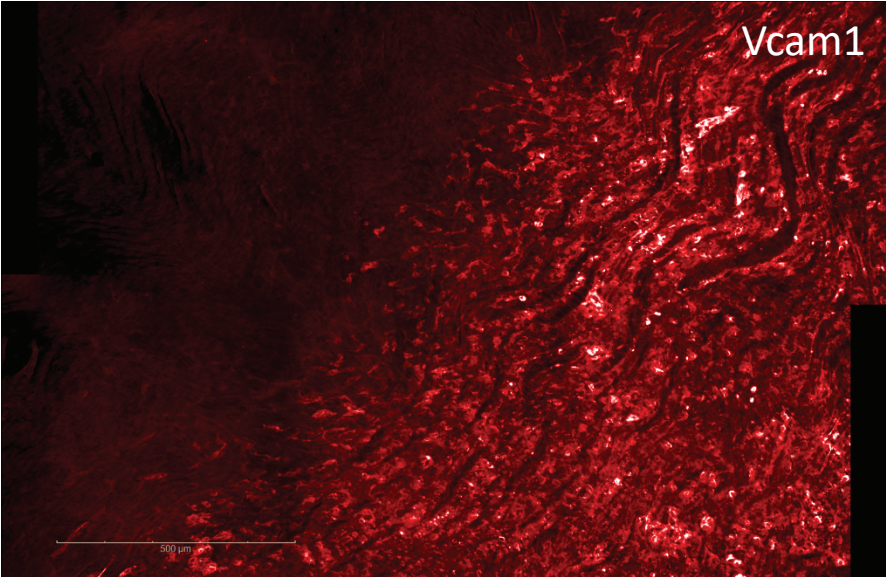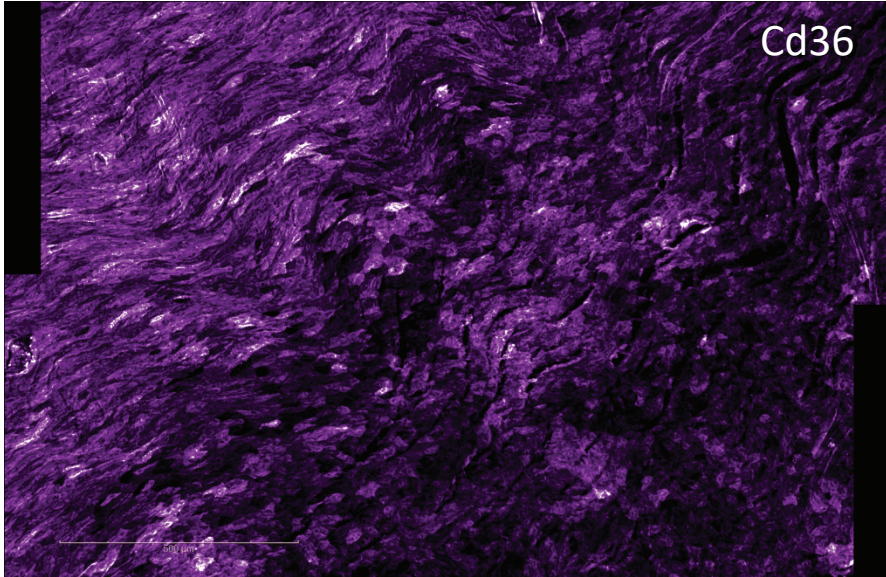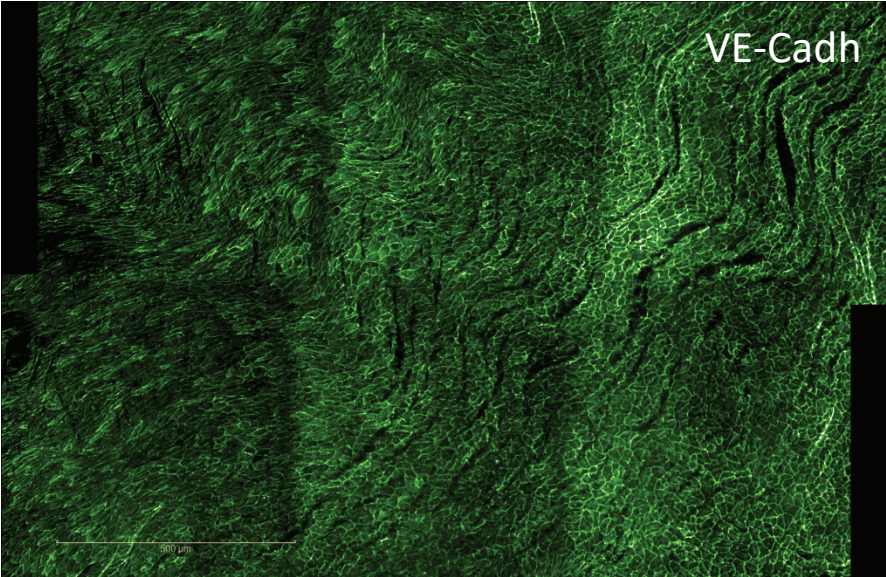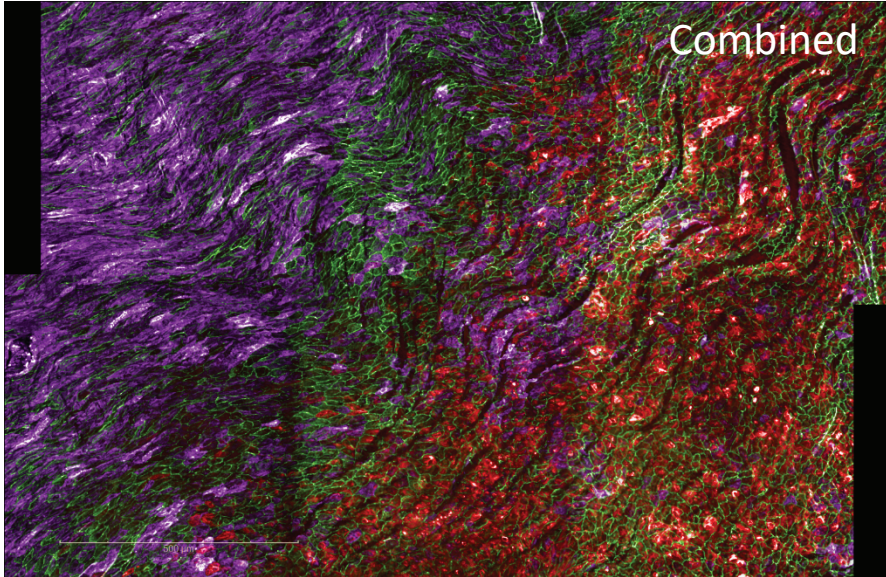

## **Supplemental Figure Legends**

**Supplemental Figure 1:** Comparison of collagenase/hyaluronidase/DNAse dissociation protocol (original, left) with elastase/collagenase dissociation protocol (right). t-SNE plots summarizing single-cell RNA-seq profiles for each protocol with vascular cell populations labeled. EC indicates endothelial cells; Fibro, fibroblasts; Macro, macrophages; Mono, monocytes; VSMC, vascular smooth muscle cells.

**Supplemental Figure 2:** t-SNE demonstrating contribution of all analyzed mice to each subpopulation in the overall scRNA-seq profile of the aorta. scRNA-seq profiling of 4 wild-type mouse aortas (wt1-4) demonstrates that subpopulation clustering is not a function of sample origin, and that all samples contribute to all transcriptionally identified populations.

**Supplemental Figure 3:** Acta2 expression in aortic fibroblasts vs. VSMCs. Violin plot demonstrates increased expression of Acta2 in aortic VSMCs relative to aortic fibroblasts, but nonzero expression in both populations. Violin plot y-axis demonstrates normalized transcript expression values. Fibro indicates fibroblasts; VSMC, vascular smooth muscle cells.

**Supplemental Figure 4:** Immediate-early gene (IEG; Fos, Fosb, Jun, Junb) activation score for aortic cellular subpopulations. Immediate-early gene activation score does not differentiate the 3 EC subpopulations identified in this study, and these genes are minimally expressed (scores < 0) in aortic ECs, VSMCs, and fibroblasts. EC indicates endothelial cells; Fibro, fibroblasts; Macro, macrophages; Mono, monocytes; VSMC, vascular smooth muscle cells.

**Supplemental Figure 5:** Resolution of major aortic cell types using lower-depth scRNAseq. Seurat clustering analysis pipeline applied to low-depth (17k reads/cell) scRNA-seq library demonstrates resolution of the same major aortic cell populations, including 3 distinct EC populations. EC indicates endothelial cells; Fibro, fibroblasts; Macro, macrophages; Mono, monocytes; VSMC, vascular smooth muscle cells.

**Supplemental Figure 6:** Reactome pathway enrichment for the top 50 markers of EC 1 (left) and EC 2 (right) using R package ReactomePA. Dot size indicates number of marker genes included in pathway and dot color indicates Benjamini-Hochberg adjusted p-value. Reactome pathways with adjusted p-values < 0.05 are displayed.

**Supplemental Figure 7:** Gating protocol for FACS analysis of Vcam1 and Cd36 expression in aortic endothelial cells.

**Supplemental Figure 8:** Schematic representation of aortic root, descending aorta, and lesser and greater curvature regions.

**Supplemental Figure 9:** a) Representative immunofluorescence images of aortic root greater curvature including staining for Vcam1, Cd36, VE-Cadherin, and combination

image. b) Representative immunofluorescence images of aortic root lesser curvature including staining for Vcam1, Cd36, VE-Cadherin, and combination image.

**Supplemental Figure 10:** Representative immunofluorescence images of transition zone between Vcam1-high region and Cd36-high region in the aortic root.
